# Supplementary material
Source: PubMed Central journal article supplement (PMC3073385)
Supplement: supp_nsq031_scan-09-072-File005.pdf [file supp_nsq031_scan-09-072-File005.pdf]

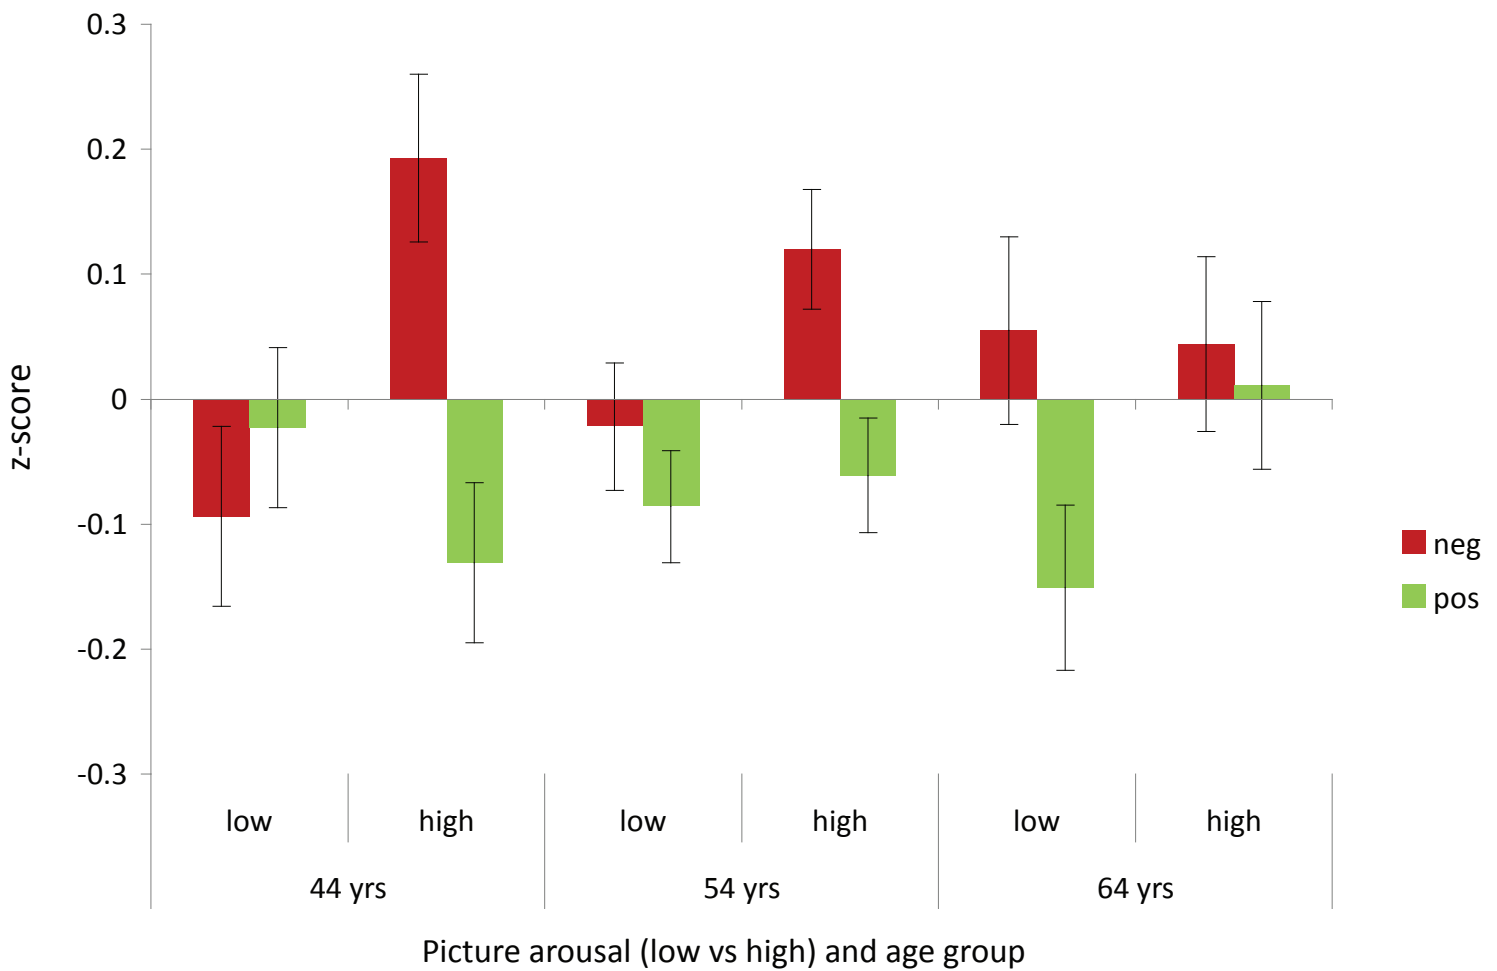

Supplemental Figure: Eyeblink startle magnitudes are depicted for low arousing (i.e. normative arousal rating of less than 5.37) and high arousing (> 5.37) negative (in red) and positive (in light green) pictures. These results are plotted for age at the average age (54 years) and 1 SD ( $\pm 10$  years) above or below the average age are depicted. Whereas the emotion-modulated effect on eyeblink startle is significant for the highly arousing pictures only in the younger -aged individuals, this effect is only shown for the low arousing pictures in the elderly. Error bars depict the standard error. neg = negative; pos = positive.
